# Supplementary material
Source: ML conference proceedings conference paper supplement (https://proceedings.neurips.cc/paper_files/paper/2015/hash/eaa32c96f620053cf442ad32258076b9-Abstract.html)
Supplement: Supplementary file 1 [file eaa32c96f620053cf442ad32258076b9-Supplemental.zip]

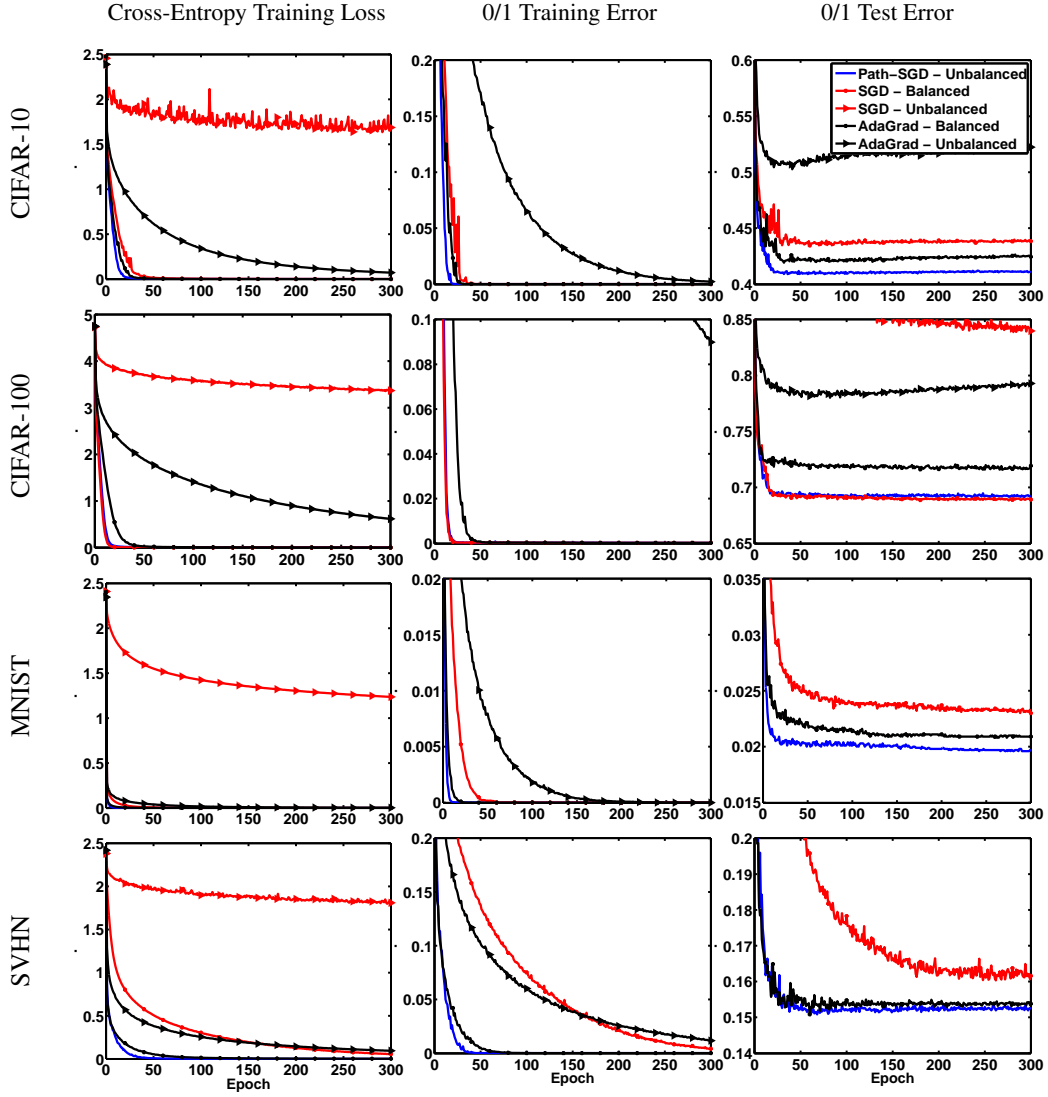

Figure 1: Learning curves using different optimization methods for 4 datasets without dropout. Left panel displays the cross-entropy objective function; middle and right panels show the corresponding values of the training and test errors, where the values are reported on different epochs during the course of optimization. Best viewed in color.

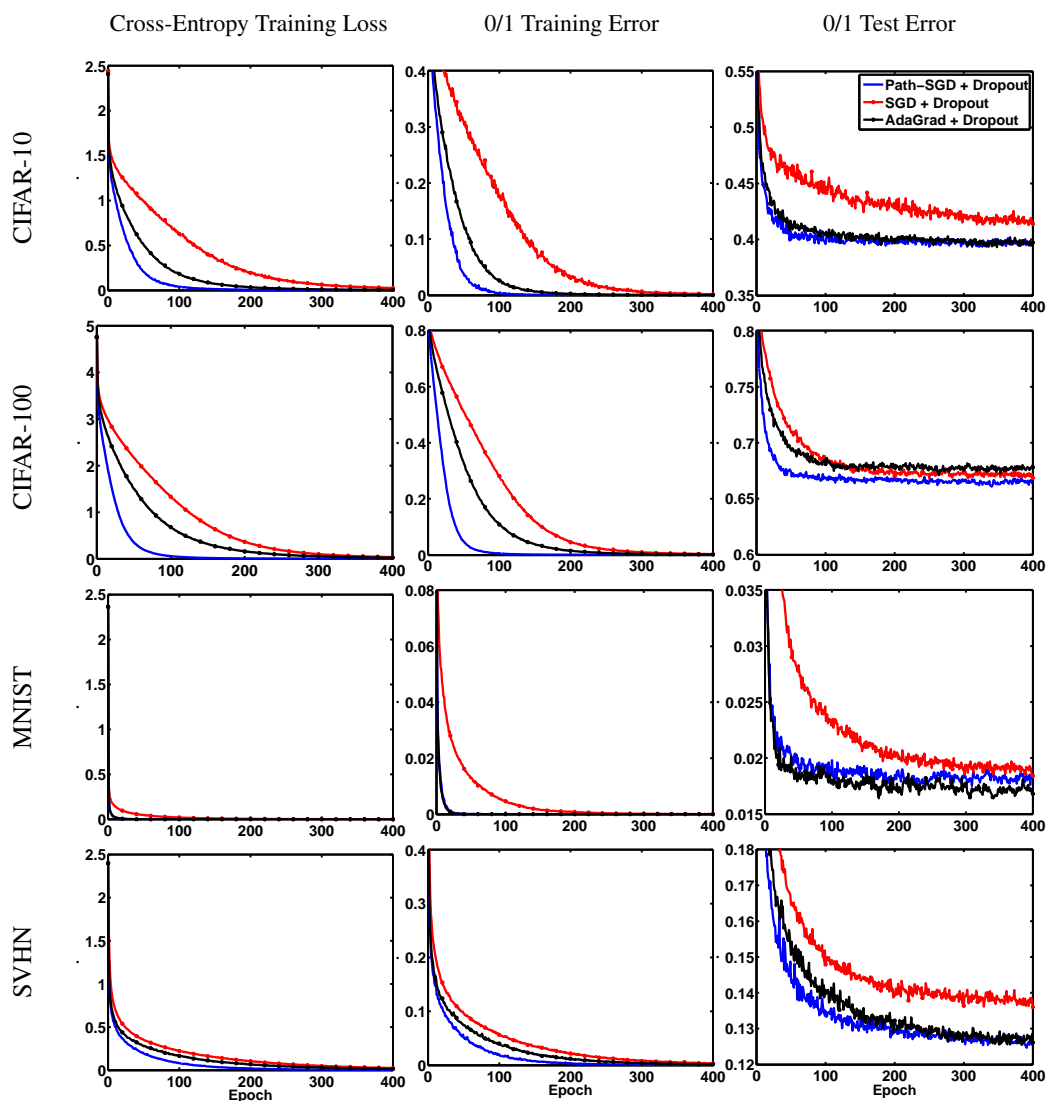

Figure 2: Learning curves using different optimization methods for 4 datasets with dropout. Left panel displays the cross-entropy objective function; middle and right panels show the corresponding values of the training and test errors. Best viewed in color.
